# Supplementary material
Source: HighWire-hosted journal article supplement (https://bmjopenquality.bmj.com/content/6/2/e000042)
Supplement: inline-supplementary-material-1 [file inline-supplementary-material-1.docx]

Appendix A:

Always Event Patient Survey Questionnaire – Repeat Prescribing

What do you feel is so important that it should **ALWAYS** happen when you request a repeat prescription________?

1.

|  |
| --- |

2.

|  |
| --- |

3.

|  |
| --- |
